# Supplementary material for: Response of Pine Rhizosphere Microbiota to Foliar Treatment with Resistance-Inducing Bacteria against Pine Wilt Disease
Source: MDPI journal article supplement (doi:10.3390/microorganisms9040688), 2021-03-26
Supplement: s1 [file s1]

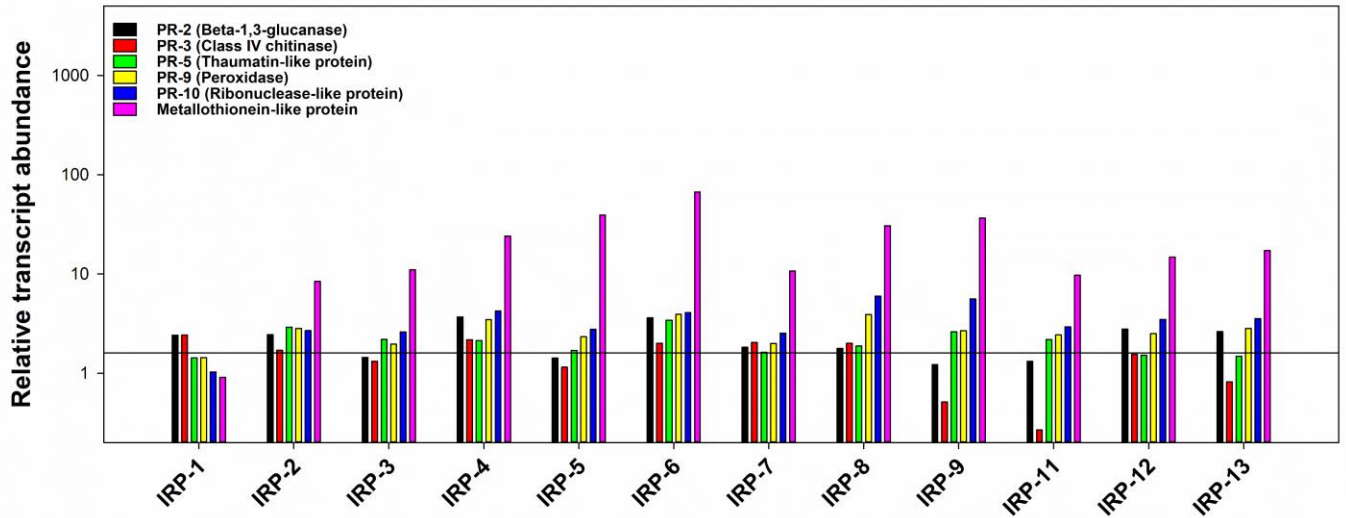

**Figure S1.** Relative transcript abundance of the defence-related genes PR-2 family (b-1,3-glucanase), PR-3 family (class IV chitinase), PR-5 family (thaumatococcus-like protein), PR-9 family (peroxidase), PR-10 family (ribonuclease-like protein), antimicrobial peptide and metallothionein-like protein in *Pinus densiflora* calli treated with selected bacterial strains isolated from pine forests. Quantitative real-time PCR results from treated calli were normalized relative to an untreated callus as a control. The horizontal line represents unchanged gene expression.

**Table S1.** Results of the high throughput sequencing representing the total bases, read count, GC%, Q20% and Q30%

| Sample    | Total bases | Read count | GC (%) | Q20 (%) | Q30 (%) |
|-----------|-------------|------------|--------|---------|---------|
| C.1       | 38,381,755  | 84,870     | 54.74  | 98.55   | 95.23   |
| C.2       | 42,702,628  | 94,134     | 54.41  | 98.55   | 95.25   |
| C.3       | 43,350,263  | 95,572     | 54.83  | 98.58   | 95.37   |
| C.4       | 45,499,877  | 100,657    | 54.72  | 98.59   | 95.34   |
| IRP20.1   | 43,211,809  | 95,489     | 54.69  | 98.58   | 95.29   |
| IRP20.2   | 47,626,696  | 105,046    | 54.79  | 98.6    | 95.3    |
| IRP20.3   | 44,501,929  | 98,381     | 54.37  | 98.61   | 95.37   |
| IRP20.4   | 43,911,832  | 97,115     | 54.62  | 98.64   | 95.41   |
| IRP21.1   | 43,190,112  | 95,628     | 54.86  | 98.52   | 95.09   |
| IRP21.2   | 42,920,113  | 94,802     | 54.68  | 98.71   | 95.62   |
| IRP21.3   | 42,968,966  | 94,660     | 54.8   | 98.57   | 95.23   |
| IRP21.4   | 46,916,335  | 103,383    | 54.86  | 98.7    | 95.58   |
| NI.1      | 50,010,132  | 110,963    | 54.61  | 98.72   | 95.64   |
| NI.2      | 49,236,449  | 108,878    | 54.35  | 98.61   | 95.31   |
| NI.3      | 48,641,503  | 107,219    | 54.28  | 98.46   | 95.04   |
| NI.4      | 45,977,229  | 101,697    | 54.55  | 98.63   | 95.43   |
| N+IRP20.1 | 45,582,825  | 100,688    | 54.06  | 98.51   | 95.13   |
| N+IRP20.2 | 46,636,931  | 103,055    | 54.26  | 98.56   | 95.17   |
| N+IRP20.3 | 47,117,369  | 103,968    | 54.4   | 98.54   | 95.26   |
| N+IRP20.4 | 51,031,958  | 112,646    | 54.38  | 98.69   | 95.61   |
| N+IRP21.1 | 45,448,172  | 100,449    | 54.54  | 98.52   | 95.12   |
| N+IRP21.2 | 48,227,030  | 105,848    | 54.48  | 98.54   | 95.26   |
| N+IRP21.3 | 49,528,975  | 109,079    | 54.37  | 98.63   | 95.42   |
| N+IRP21.4 | 38,022,394  | 84,016     | 54.12  | 98.22   | 93.97   |

C, negative control; I20, samples treated with *Pesudomonas koreensis* IRP20; IRP21 samples treated with *Lysobacter enzymogenes* IRP21; N, nematode-inoculated; N+IRP20, nematode-inoculated samples treated with *P. koreensis* IRP20; N+IRP21, nematode-inoculated samples treated with *L. enzymogenes* IRP21.
